# Supplementary material for: A novel mechanism of unstable heteroresistance via reversible ompP2 mutations in Haemophilus influenzae
Source: Research Square preprint supplement (doi:10.21203/rs.3.rs-7027370/v1), 2025-07-21
Supplement: Supplementary file 1 [file cbed3117d6dfb23fd2363340.pdf]

Clone

E\_0.032Cro.1\_11a R1

E\_0.064Cro.1\_18b R1

E\_0.004Cro.3\_02b R1

E\_0.004Cro.3\_02c R1

0

1

2

3

4

5

6

7

8

Passage

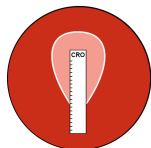

homogeneous population  
with high MIC (bacterial lawn  
shown in red and inhibition  
zone in light red)

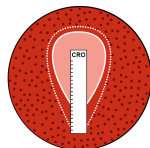

heterogeneous population  
with high-MIC main  
population (shown in red)  
and low-MIC subpopulation  
(dark red dots)

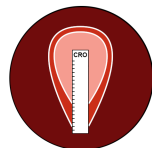

heterogeneous population  
with high-MIC subpopulation  
(red) and low-MIC  
subpopulation (dark red)

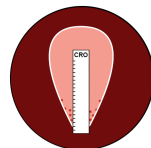

heterogeneous population  
with low-MIC main population  
(dark red) and high MIC  
subpopulation (red dots)

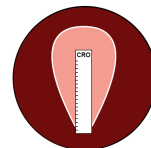

homogeneous population  
with low MIC (dark red)
