# Supplementary material for: A novel mechanism of unstable heteroresistance via reversible ompP2 mutations in Haemophilus influenzae
Source: Research Square preprint supplement (doi:10.21203/rs.3.rs-7027370/v1), 2025-07-21
Supplement: Supplementary file 1 [file f5671d821fc261dfb3001070.xlsx]

## Sheet: Suppl_Table_S1
Supplementary Table S1: Clones used in this study with infomation on present mutations (relative to H. influenzae Rd KW20). Clones derive from two independet evolution experiments with reference strain H. influenzae Rd KW20 in the presence of ceftriaxone.
Strain	Mutations relative to reference strain Rd KW20 (resulting amino acid substitution)
H. influenzae Rd KW20 E_0.032Cro.1_0011a	g.206583C>T (RpsM p.Ala18Thr), g.902541_902708inv (OmpP2 p.Gly354fs), g.1692003G>A
H. influenzae Rd KW20 E_0.064Cro.1_0018b	g.799866c>A (Pnp p.Glu80*), g.902541_902708inv (OmpP2 p.Gly354fs), g.1600755_1600756insT (Rd_08000 p.Pro47fs), g.1692003G>A
H. influenzae Rd KW20 E_0.004Cro.3_0002b	g.902541_902708inv (OmpP2 p.Gly354fs)
H. influenzae Rd KW20 E_0.004Cro.3_0002c	g.903387_903388insT (OmpP2 p.Thr126fs)

## Sheet: Suppl_Table_S2
Supplementary Table S2: Frequencies of mutant allele in the respective passages of evolving populations of H. influenzae Rd KW20 E_0.032Cro.1_0011a, E_0.064Cro.1_0018b, E_0.004Cro.3_0002b, and E_0.004Cro.3_0002c. The ratio of reads supporting the mutant allele to coverage at the respective position is stated in brackets. Reference allele refers to the allele present in reference strain H. influen…
	Sample ID	Accession	SNPs and Indels via GATK										Mechanism	ompP2 inversion via Pindel		impaired ompP2 ORF via GATK
Position			206583	799866	9025401	903385	903386	903387	903387i1	903398	1600755i1	1692003		902541 ±5bp to 902708 ±5bp	Calculation	between 903385 to 903398	Calculation
Reference allel			C	C	A	T	A	G		A		G
Mutation type			SNP	SNP	SNP	SNP	SNP	SNP	Insertion	Deletion	Insertion	SNP		Inversion		Deletion of different nucleotides
Mutant allel			T (p.Ala18Thr)	A (p.Glu80*)	G	A	G	T	T (p.Thr126fs)	GAP	A (p.Pro47fs)	A
Gene			Rd_00990c	Rd_04055c	-	Rd_04550c	Rd_04550c	Rd_04550c	Rd_04550c	Rd_04550c	Rd_08000	-		intergenic → Rd_04550c		Rd_04550c
Gene name			rpsM CDS	pnp CDS	-	ompP2 CDS	ompP2 CDS	ompP2 CDS	ompP2 CDS	ompP2 CDS	putative TonB-dependent receptor CDS	-		intergenic → ompP2 CDS		ompP2 CDS
Annotation			30S ribosomal protein S13	polyribonucleotide nucleotidyltransferase	-	outer membrane protein P2 (ompP2)	outer membrane protein P2 (ompP2)	outer membrane protein P2 (ompP2)	outer membrane protein P2 (ompP2)	outer membrane protein P2 (ompP2)	putative TonB-dependent receptor	-		intergenic → outer membrane protein P2 (ompP2)		outer membrane protein P2 (ompP2)
H. influenzae Rd KW20 E_0.032Cro.1_0011a Replicate 1 Passage 1	HAE-589		98.2 (107/109)	0.0 (0/60)	100.0 (6/6)	0.0 (0/148)	0.0 (0/150)	0.0 (0/150)	NA	0.0 (0/149)	NA	100.0 (54/54)	inversion at position 902541 to 902708 reverts	97.5 (117/120)	reads supporting the inversion divided by sum of reads supporting the inversion and reads supporting the reference		-
H. influenzae Rd KW20 E_0.032Cro.1_0011a Replicate 1 Passage 2	HAE-590		98.1 (103/105)	0.0 (0/87)	100.0 (6/6)	0.0 (0/162)	0.0 (0/163)	0.0 (0/166)	NA	0.0 (0/160)	NA	100.0 (90/90)		95.4 (146/153)
H. influenzae Rd KW20 E_0.032Cro.1_0011a Replicate 1 Passage 3	HAE-591		100.0 (132/132)	0.0 (0/85)	100.0 (94/94)	0.0 (0/156)	0.0 (0/156)	0.0 (0/157)	NA	0.0 (0/153)	NA	100.0 (61/61)		7.4 (8/108)
H. influenzae Rd KW20 E_0.032Cro.1_0011a Replicate 1 Passage 8	HAE-592		98.6 (143/145)	0.0 (0/108)	100.0 (134/134)	0.0 (0/227)	0.0 (0/229)	0.0 (0/232)	NA	0.0 (0/231)	NA	99.0 (102/103)		NA
H. influenzae Rd KW20 E_0.032Cro.1_0011a Replicate 2 Passage 1	HAE-593		100.0 (137/137)	1.4 (1/69)	100.0 (3/3)	0.0 (0/176)	0.0 (0/172)	0.0 (0/179)	NA	0.0 (0/169)	NA	100.0 (53/53)	inversion at position 902541 to 902708 reverts	97.5 (119/122)
H. influenzae Rd KW20 E_0.032Cro.1_0011a Replicate 2 Passage 2	HAE-594		98.1 (106/108)	0.0 (0/87)	100.0 (4/4)	0.0 (0/164)	0.0 (0/161)	0.0 (0/162)	NA	0.0 (0/164)	NA	100.0 (72/72)		91.5 (118/129)
H. influenzae Rd KW20 E_0.032Cro.1_0011a Replicate 2 Passage 3	HAE-595		100.0 (117/117)	0.0 (0/104)	100.0 (41/41)	0.0 (0/153)	0.0 (0/153)	0.0 (0/154)	NA	0.0 (0/147)	NA	100.0 (94/94)		60.0 (75/125)
H. influenzae Rd KW20 E_0.032Cro.1_0011a Replicate 2 Passage 8	HAE-596		100.0 (123/123)	0.0 (0/89)	100.0 (136/136)	0.0 (0/159)	0.0 (0/156)	0.0 (0/160)	NA	0.0 (0/147)	NA	100.0 (80/80)		NA
H. influenzae Rd KW20 E_0.032Cro.1_0011a Replicate 3 Passage 1	HAE-597		100.0 (115/115)	0.0 (0/66)	100.0 (4/4)	0.0 (0/113)	0.0 (0/112)	0.0 (0/114)	NA	0.0 (0/114)	NA	100.0 (67/67)	inversion at position 902541 to 902708 reverts	95.0 (95/100)
H. influenzae Rd KW20 E_0.032Cro.1_0011a Replicate 3 Passage 2	HAE-598		95.4 (104/109)	0.0 (0/70)	100.0 (11/11)	0.0 (0/172)	0.0 (0/169)	0.0 (0/170)	NA	0.0 (0/171)	NA	100.0 (64/64)		92.2 (119/129)
H. influenzae Rd KW20 E_0.032Cro.1_0011a Replicate 3 Passage 3	HAE-599		97.8 (135/138)	1.4 (1/72)	100.0 (112/112)	0.0 (0/140)	0.0 (0/141)	0.0 (0/144)	100.0 (1/1)	0.0 (0/141)	NA	99.0 (95/96)		5.1 (8/157)
H. influenzae Rd KW20 E_0.032Cro.1_0011a Replicate 3 Passage 8	HAE-600		100.0 (135/135)	1.2 (1/85)	100.0 (90/90)	0.0 (0/152)	0.0 (0/154)	0.0 (0/154)	NA	0.0 (0/150)	NA	100.0 (82/82)		NA
H. influenzae Rd KW20 E_0.064Cro.1_0018b Replicate 1 Passage 1	HAE-601		0.0 (0/129)	100.0 (96/96)	100.0 (5/5)	0.0 (0/172)	0.0 (0/172)	0.0 (0/173)	NA	0.0 (0/177)	97.5 (116/119)	100.0 (86/86)	inversion at position 902541 to 902708 reverts	95.5 (147/154)
H. influenzae Rd KW20 E_0.064Cro.1_0018b Replicate 1 Passage 2	HAE-602		0.9 (1/107)	98.9 (92/93)	100.0 (8/8)	0.0 (0/208)	0.0 (0/207)	0.0 (0/207)	NA	0.0 (0/210)	97.0 (97/100)	100.0 (94/94)		94.5 (138/146)
H. influenzae Rd KW20 E_0.064Cro.1_0018b Replicate 1 Passage 3	HAE-603		0.0 (0/149)	100.0 (96/96)	100.0 (82/82)	0.0 (0/215)	0.0 (0/213)	0.0 (0/214)	NA	0.0 (0/214)	97.8 (133/136)	100.0 (83/83)		24.5 (37/151)
H. influenzae Rd KW20 E_0.064Cro.1_0018b Replicate 1 Passage 8	HAE-604		0.0 (0/167)	100.0 (138/138)	100.0 (136/136)	0.0 (0/230)	0.0 (0/229)	0.0 (0/228)	NA	0.0 (0/221)	98.6 (142/144)	100.0 (114/114)		NA
H. influenzae Rd KW20 E_0.064Cro.1_0018b Replicate 2 Passage 1	HAE-605		0.0 (0/122)	100.0 (91/91)	100.0 (4/4)	0.0 (0/241)	0.0 (0/238)	0.0 (0/240)	NA	0.0 (0/240)	98.0 (100/102)	100.0 (101/101)	inversion at position 902541 to 902708 reverts	NA
H. influenzae Rd KW20 E_0.064Cro.1_0018b Replicate 2 Passage 2	HAE-606		0.0 (0/143)	100.0 (82/82)	100.0 (7/7)	0.0 (0/158)	0.0 (0/161)	0.0 (0/163)	NA	0.0 (0/156)	96.7 (89/92)	100.0 (80/80)		93.8 (121/129)
H. influenzae Rd KW20 E_0.064Cro.1_0018b Replicate 2 Passage 3	HAE-607		0.0 (0/143)	100.0 (109/109)	100.0 (90/90)	0.0 (0/212)	0.0 (0/214)	0.0 (0/212)	NA	0.0 (0/203)	98.0 (98/100)	100.0 (102/102)		28.6 (40/140)
H. influenzae Rd KW20 E_0.064Cro.1_0018b Replicate 2 Passage 8	HAE-608		0.0 (0/151)	100.0 (109/109)	100.0 (148/148)	0.0 (0/237)	0.0 (0/238)	0.0 (0/239)	NA	0.0 (0/248)	96.7 (118/122)	98.8 (81/82)		NA
H. influenzae Rd KW20 E_0.064Cro.1_0018b Replicate 3 Passage 1	HAE-609		0.0 (0/126)	100.0 (105/105)	100.0 (3/3)	0.0 (0/205)	0.0 (0/206)	0.0 (0/208)	NA	0.0 (0/205)	97.9 (137/140)	100.0 (96/96)	inversion at position 902541 to 902708 reverts	98.0 (144/147)
H. influenzae Rd KW20 E_0.064Cro.1_0018b Replicate 3 Passage 2	HAE-610		0.0 (0/200)	100.0 (136/136)	100.0 (8/8)	0.0 (0/286)	0.0 (0/288)	0.0 (0/291)	NA	0.0 (0/292)	97.5 (157/161)	100.0 (129/129)		97.2 (239/246)
H. influenzae Rd KW20 E_0.064Cro.1_0018b Replicate 3 Passage 3	HAE-611		0.0 (0/90)	100.0 (61/61)	100.0 (34/34)	0.0 (0/157)	0.0 (0/158)	0.0 (0/159)	NA	0.0 (0/155)	98.9 (92/93)	100.0 (67/67)		75.6 (102/135)
H. influenzae Rd KW20 E_0.064Cro.1_0018b Replicate 3 Passage 8	HAE-612		0.6 (1/170)	100.0 (124/124)	100.0 (166/166)	0.0 (0/231)	0.0 (0/233)	0.0 (0/235)	NA	0.0 (0/224)	95.6 (129/135)	100.0 (90/90)		NA
H. influenzae Rd KW20 E_0.004Cro.3_0002b Replicate 1 Passage 1	HAE-613		0.8 (1/128)	0.0 (0/92)	100.0 (9/9)	0.0 (0/169)	0.0 (0/166)	0.0 (0/165)	NA	0.0 (0/160)	NA	0.0 (0/90)	inversion at position 902541 to 902708 reverts	98.4 (189/192)
H. influenzae Rd KW20 E_0.004Cro.3_0002b Replicate 1 Passage 2	HAE-614		0.0 (0/145)	0.0 (0/85)	100.0 (8/8)	0.0 (0/209)	0.0 (0/206)	0.0 (0/205)	NA	0.0 (0/202)	NA	0.0 (0/84)		93.8 (150/160)
H. influenzae Rd KW20 E_0.004Cro.3_0002b Replicate 1 Passage 3	HAE-615		0.0 (0/135)	1.1 (1/88)	100.0 (80/80)	0.0 (0/192)	0.0 (0/192)	0.0 (0/192)	NA	0.0 (0/189)	NA	0.0 (0/91)		44.8 (81/181)
H. influenzae Rd KW20 E_0.004Cro.3_0002b Replicate 1 Passage 8	HAE-616		0.0 (0/170)	0.0 (0/92)	100.0 (150/150)	0.0 (0/245)	0.0 (0/243)	0.0 (0/248)	NA	0.0 (0/237)	NA	0.0 (0/83)		NA
H. influenzae Rd KW20 E_0.004Cro.3_0002b Replicate 2 Passage 1	HAE-617		0.0 (0/141)	0.0 (0/87)	100.0 (11/11)	0.0 (0/181)	0.0 (0/188)	0.0 (0/186)	NA	0.0 (0/182)	NA	0.0 (0/103)	inversion at position 902541 to 902708 reverts	97.5 (157/161)
H. influenzae Rd KW20 E_0.004Cro.3_0002b Replicate 2 Passage 2	HAE-618		0.0 (0/123)	0.0 (0/107)	100.0 (16/16)	0.0 (0/222)	0.0 (0/223)	0.0 (0/226)	NA	0.0 (0/221)	NA	0.0 (0/88)		95.5 (169/177)
H. influenzae Rd KW20 E_0.004Cro.3_0002b Replicate 2 Passage 3	HAE-619		0.0 (0/155)	0.0 (0/85)	100.0 (60/60)	0.0 (0/192)	0.0 (0/192)	0.0 (0/197)	NA	0.0 (0/180)	NA	0.0 (0/96)		49.4 (87/176)
H. influenzae Rd KW20 E_0.004Cro.3_0002b Replicate 2 Passage 8	HAE-620		0.0 (0/157)	0.9 (1/112)	100.0 (184/184)	0.0 (0/245)	0.0 (0/246)	0.0 (0/248)	NA	0.0 (0/240)	NA	0.0 (0/119)		NA
H. influenzae Rd KW20 E_0.004Cro.3_0002b Replicate 3 Passage 1	HAE-621		0.0 (0/156)	0.0 (0/92)	100.0 (8/8)	0.0 (0/228)	0.0 (0/226)	0.0 (0/233)	NA	0.0 (0/219)	NA	0.0 (0/96)	inversion at position 902541 to 902708 reverts	97.1 (170/175)
H. influenzae Rd KW20 E_0.004Cro.3_0002b Replicate 3 Passage 2	HAE-622		0.0 (0/119)	0.0 (0/91)	100.0 (15/15)	0.0 (0/185)	0.0 (0/190)	0.0 (0/192)	NA	0.0 (0/195)	NA	0.0 (0/77)		89.6 (164/183)
H. influenzae Rd KW20 E_0.004Cro.3_0002b Replicate 3 Passage 3	HAE-623		0.0 (0/115)	0.0 (0/82)	100.0 (93/93)	0.0 (0/191)	0.0 (0/188)	0.0 (0/189)	NA	0.0 (0/194)	NA	0.0 (0/80)		26.5 (40/151)
H. influenzae Rd KW20 E_0.004Cro.3_0002b Replicate 3 Passage 8	HAE-624		0.0 (0/180)	0.0 (0/120)	100.0 (202/202)	0.0 (0/261)	0.0 (0/268)	0.0 (0/263)	NA	0.0 (0/253)	NA	0.0 (0/97)		NA
H. influenzae Rd KW20 E_0.004Cro.3_0002c Replicate 1 Passage 1	HAE-625		0.0 (0/177)	0.0 (0/110)	0.0 (0/164)	0.0 (0/210)	0.0 (0/207)	0.0 (0/205)	100.0 (196/196)	0.0 (0/199)	NA	0.0 (0/117)	inserted T at 903387i1 gets deleted again	NA	-	95.6098	reads supporting T at 903387i1 divided by coverage at 903387
H. influenzae Rd KW20 E_0.004Cro.3_0002c Replicate 1 Passage 3	HAE-626		0.0 (0/159)	0.0 (0/102)	0.0 (0/144)	0.0 (0/217)	0.0 (0/221)	0.0 (0/218)	100.0 (210/210)	0.0 (0/209)	NA	0.0 (0/93)		NA		96.3303
H. influenzae Rd KW20 E_0.004Cro.3_0002c Replicate 1 Passage 4	HAE-627		0.0 (0/143)	0.0 (0/96)	0.0 (0/123)	0.0 (0/224)	0.0 (0/223)	0.0 (0/226)	93.8 (76/81)	0.0 (0/223)	NA	0.0 (0/91)		NA		33.6283
H. influenzae Rd KW20 E_0.004Cro.3_0002c Replicate 1 Passage 8	HAE-628		0.0 (0/160)	0.0 (0/106)	0.7 (1/149)	0.0 (0/219)	0.0 (0/218)	0.0 (0/222)	NA	0.0 (0/217)	NA	0.0 (0/93)		NA		0
H. influenzae Rd KW20 E_0.004Cro.3_0002c Replicate 2 Passage 1	HAE-629		0.0 (0/130)	0.0 (0/111)	0.0 (0/127)	0.0 (0/242)	0.0 (0/244)	0.0 (0/244)	100.0 (235/235)	0.0 (0/241)	NA	0.0 (0/82)	inserted T at 903387i1 stays and A at 903398 gets deleted + T at 903385 gets deleted (different subpopulations)	NA	-	100	100% minus frequency GAP at 903398 minus mean frequency of SNPs at 903385 to 903387
H. influenzae Rd KW20 E_0.004Cro.3_0002c Replicate 2 Passage 4	HAE-630		0.0 (0/127)	0.0 (0/103)	0.0 (0/125)	0.0 (0/195)	0.0 (0/196)	0.0 (0/196)	100.0 (188/188)	8.2 (15/184)	NA	0.0 (0/111)		NA		91.8
H. influenzae Rd KW20 E_0.004Cro.3_0002c Replicate 2 Passage 5	HAE-631		0.0 (0/173)	0.0 (0/104)	0.0 (0/126)	7.9 (17/215)	7.9 (17/214)	10.4 (23/221)	100.0 (190/190)	62.5 (135/216)	NA	0.0 (0/87)		NA		28.7667
H. influenzae Rd KW20 E_0.004Cro.3_0002c Replicate 2 Passage 8	HAE-632		0.5 (1/219)	0.0 (0/127)	0.0 (0/228)	17.4 (54/310)	17.3 (53/306)	19.9 (63/316)	100.0 (246/246)	78.3 (249/318)	NA	0.0 (0/141)		NA		3.5
H. influenzae Rd KW20 E_0.004Cro.3_0002c Replicate 3 Passage 1	HAE-633		0.0 (0/126)	0.0 (0/84)	0.0 (0/129)	0.0 (0/180)	0.0 (0/178)	0.0 (0/174)	99.4 (166/167)	0.0 (0/169)	NA	0.0 (0/57)	inserted T at 903387i1 stays and T at 903385 gets deleted	NA	-	100	100% minus mean frequency of SNPs at 903385 to 903387
H. influenzae Rd KW20 E_0.004Cro.3_0002c Replicate 3 Passage 3	HAE-634		0.0 (0/174)	0.0 (0/118)	0.0 (0/150)	0.5 (1/202)	0.5 (1/202)	0.5 (1/200)	99.5 (189/190)	0.0 (0/200)	NA	0.0 (0/101)		NA		99.5
H. influenzae Rd KW20 E_0.004Cro.3_0002c Replicate 3 Passage 4	HAE-635		0.0 (0/141)	0.0 (0/85)	0.0 (0/116)	64.0 (119/186)	64.1 (118/184)	65.1 (123/189)	100.0 (61/61)	0.0 (0/200)	NA	0.0 (0/81)		NA		35.6
H. influenzae Rd KW20 E_0.004Cro.3_0002c Replicate 3 Passage 8	HAE-636		0.0 (0/193)	0.0 (0/159)	0.0 (0/157)	96.6 (254/263)	96.2 (256/266)	97.0 (256/264)	NA	0.0 (0/280)	NA	0.0 (0/132)		NA		3.4
